# Supplementary material for: Human hippocampal responses to network intracranial stimulation vary with theta phase
Source: eLife journal article supplement (doi:10.7554/elife.78395), 2022-12-01
Supplement: supp [file elife-78395-supp-v1.zip]

## eLife's transparent reporting form

We encourage authors to provide detailed information *within their submission* to facilitate the interpretation and replication of experiments. Authors can upload supporting documentation to indicate the use of appropriate reporting guidelines for health-related research (see [EQUATOR Network](#)), life science research (see the [BioSharing Information Resource](#)), or the [ARRIVE guidelines](#) for reporting work involving animal research. Where applicable, authors should refer to any relevant reporting standards documents in this form.

If you have any questions, please consult our Journal Policies and/or contact us: [editorial@elifesciences.org](mailto:editorial@elifesciences.org).

### Sample-size estimation

- You should state whether an appropriate sample size was computed when the study was being designed
- You should state the statistical method of sample size computation and any required assumptions
- If no explicit power analysis was used, you should describe how you decided what sample (replicate) size (number) to use

Please outline where this information can be found within the submission (e.g., sections or figure legends), or explain why this information doesn't apply to your submission:

Data were collected opportunistically from patients undergoing invasive electrophysiological monitoring as part of their clinical care. Due to the scarcity of intracranial patients with appropriate electrode coverage for this study, we did not perform explicit power analyses. We analyzed data collected from 8 participants (including 23 hippocampal electrodes), a sample size which is comparable to previous intracranial LFP and stimulation studies. We performed mixed-model analyses to ensure that observed effects were reliable at the group level.

### Replicates

- You should report how often each experiment was performed
- You should include a definition of biological versus technical replication
- The data obtained should be provided and sufficient information should be provided to indicate the number of independent biological and/or technical replicates
- If you encountered any outliers, you should describe how these were handled
- Criteria for exclusion/inclusion of data should be clearly stated
- High-throughput sequence data should be uploaded before submission, with a private link for reviewers provided (these are available from both GEO and ArrayExpress)

Please outline where this information can be found within the submission (e.g., sections or figure legends), or explain why this information doesn't apply to your submission:

No biological replications were performed. Statistical replications for multiple analyses are respectively described in **Materials and methods: Circular-linear analysis of theta phase and hippocampal response amplitude** and **Materials and methods: Oscillatory synchronization between the stimulation site and hippocampus**. Criteria for trial and channel exclusion/inclusion are stated in Materials and methods: **sEEG recording and stimulation**.

## Statistical reporting

- Statistical analysis methods should be described and justified
- Raw data should be presented in figures whenever informative to do so (typically when N per group is less than 10)
- For each experiment, you should identify the statistical tests used, exact values of N, definitions of center, methods of multiple test correction, and dispersion and precision measures (e.g., mean, median, SD, SEM, confidence intervals; and, for the major substantive results, a measure of effect size (e.g., Pearson's r, Cohen's d)
- Report exact p-values wherever possible alongside the summary statistics and 95% confidence intervals. These should be reported for all key questions and not only when the p-value is less than 0.05.

Please outline where this information can be found within the submission (e.g., sections or figure legends), or explain why this information doesn't apply to your submission:

Statistical analysis methods are described and justified in **Materials and methods**. Summary statistics, test outcomes, and effect sizes are provided in **Results**. Raw data are reported where informative (e.g., Figures 1, 2, 4, Appendix 1-Figure 2, Appendix 1-Figure 4)

(For large

datasets, or papers with a very large number of statistical tests, you may upload a single table file with tests, Ns, etc., with reference to sections in the manuscript.)

## Group allocation

- Indicate how samples were allocated into experimental groups (in the case of clinical studies, please specify allocation to treatment method); if randomization was used, please also state if restricted randomization was applied
- Indicate if masking was used during group allocation, data collection and/or data analysis

Please outline where this information can be found within the submission (e.g., sections or figure legends), or explain why this information doesn't apply to your submission:

Participants were not allocated into experimental groups. Information on how individual stimulation events were allocated into experimental conditions can be found in **Materials and Methods: Phase estimation**.

## Additional data files ("source data")

- We encourage you to upload relevant additional data files, such as numerical data that are represented as a graph in a figure, or as a summary table
- Where provided, these should be in the most useful format, and they can be uploaded as "Source data" files linked to a main figure or table
- Include model definition files including the full list of parameters used
- Include code used for data analysis (e.g., R, MatLab)
- Avoid stating that data files are "available upon request"

Please indicate the figures or tables for which source data files have been provided:

All data and custom software used in this study have been made publicly available via Zenodo
